# Supplementary material for: Sugar thiacrown-ether appended calix[4]arene as a selective chemosensor for Fe2+and Fe3+ions
Source: Royal Society of Chemistry journal article supplement (doi:10.1039/c5ra15448k), 2015-01-01
Supplement: c5ra15448k1.pdf [file c5ra15448k1.pdf]

## Sugar thiacycrown-ether appended calix[4]arene as a selective chemosensor for $\text{Fe}^{2+}$ and $\text{Fe}^{3+}$ ions

Irene Ling<sup>\*a</sup>, Rauzah Hashim<sup>a</sup> and Karem J. Sabah<sup>\*a,b</sup>

### Supplementary Information

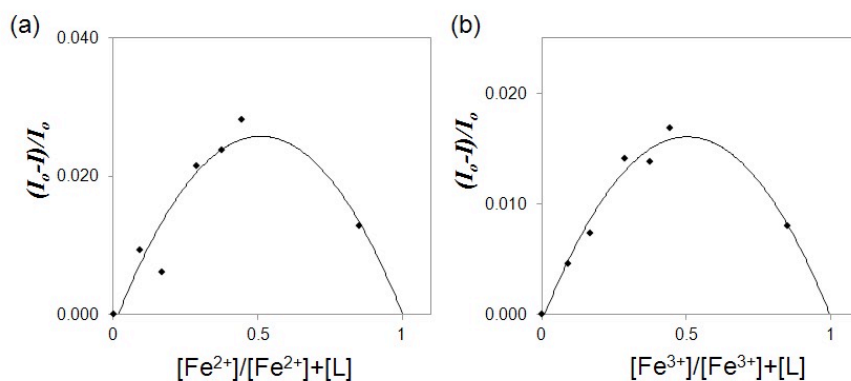

Fig. S1. Job's plot for (a)  $\text{Fe}^{2+}$  and (b)  $\text{Fe}^{3+}$  complex in MeCN: $\text{CHCl}_3$ . Ligand, **9**, concentration is  $1.0 \times 10^{-5}$  M.

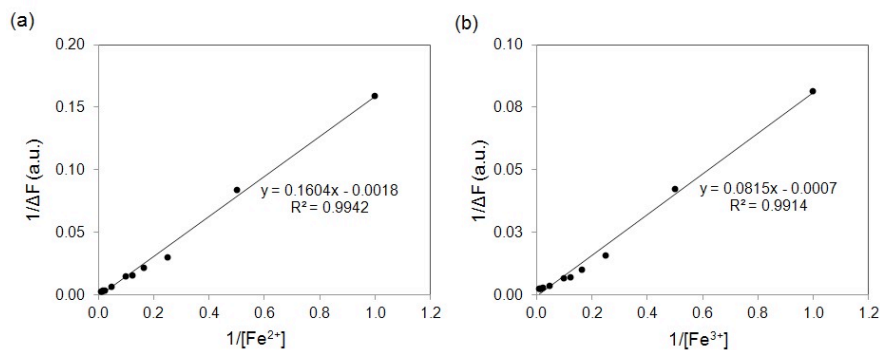

Fig. S2. The binding constants  $K_a$  for **9**-metal complexes were estimated to be  $900 \text{ M}^{-1}$  for  $\text{Fe}^{2+}$  and  $875 \text{ M}^{-1}$  for  $\text{Fe}^{3+}$ , obtained from the slope and intercept in the plot of  $1/\Delta F$  against (a)  $1/[\text{Fe}^{2+}]$  or (b)  $1/[\text{Fe}^{3+}]$ .

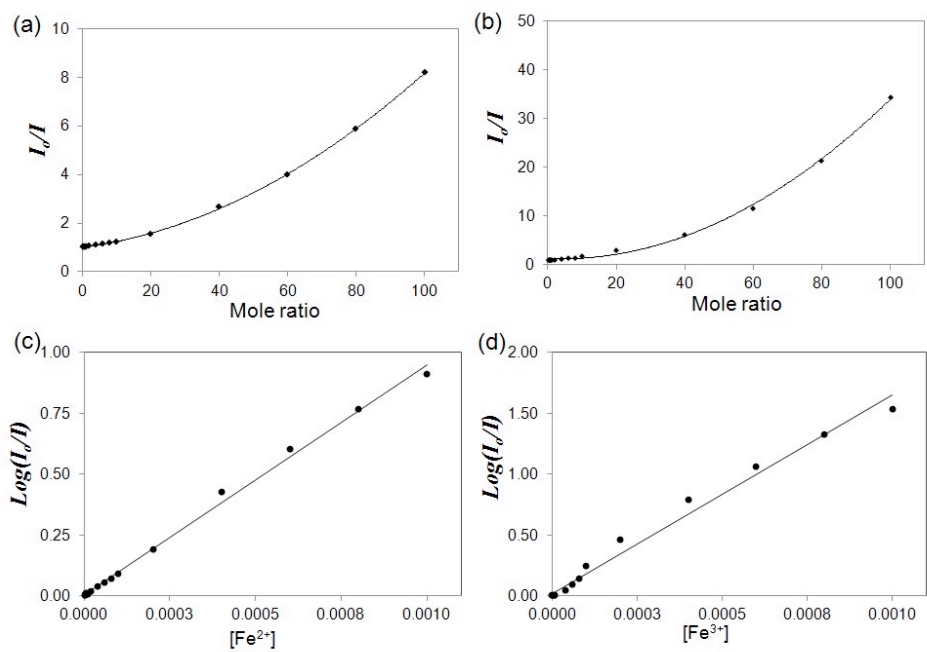

Fig S3.  $I_0/I$  versus (a)  $[\text{Fe}^{2+}]$  and (b)  $[\text{Fe}^{3+}]$  in MeCN/ $\text{CHCl}_3$  (1:1, v/v), excitation at 343 nm. Modified Stern-Volmer relationship between **9** and  $\text{Fe}^{2+}$  (c) or  $\text{Fe}^{3+}$  (d).

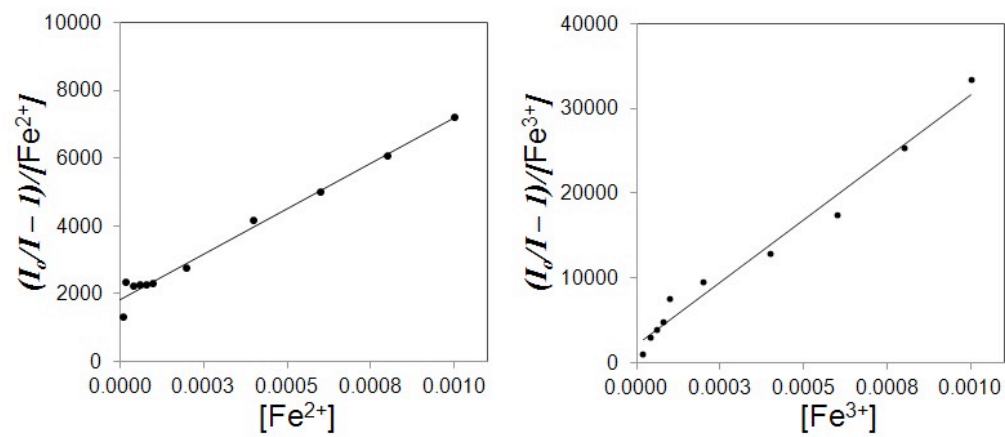

Fig S4. Plots of  $(I_0/I - 1)/[\text{Fe}^{2+}]$  versus  $[\text{Fe}^{2+}]$  and  $(I_0/I - 1)/[\text{Fe}^{3+}]$  versus  $[\text{Fe}^{3+}]$ .
